# Supplementary material
Source: MDPI journal article supplement (https://www.mdpi.com/2071-1050/12/4/1394)
Supplement: s1 [file s1]

# **Disproportionate water quality impacts from the century-old Nautanen copper mines, northern Sweden**

## Supplementary Material

Sandra Fischer<sup>1\*</sup>, Gunhild Rosqvist<sup>1</sup>, Sergey R. Chalov<sup>2</sup>, Jerker Jarsjö<sup>1</sup>

\*Corresponding author

<sup>1</sup>Department of Physical Geography, Stockholm University, SE-106 91 Stockholm, Sweden.

<sup>2</sup>Faculty of Geography, M.V. Lomonosov Moscow State University, Moscow, Russia.

E-mail: [sandra.fischer@natgeo.su.se](mailto:sandra.fischer@natgeo.su.se)

## S1. Temperature and precipitation data:

Temperature and precipitation data were taken from the CRU TS 4.02 grid-box data at 0.5° resolution produced by the Climatic Research Unit (CRU) at the University of East Anglia (available at <https://crudata.uea.ac.uk/cru/data/hrg/> and described by Harris et al. [27]). The cell 67.25 N, 20.75 E had monthly data from 1901 to 2017 and was used for water balance calculations and linear regression analysis in R to determine long-term trends.

## S2. Water sampling procedure and laboratory analyses:

During the measurement field campaign at Nautanen 2017, Table S1 describes the water sampling procedure. Water samples were collected as grab sampling in plastic polypropylene 1L bottles (rinsed before the sample collection) just below the water surface. After filtering and acidification (Table 1) samples were transferred into 10 ml (metals, cations and anions) and 50 ml (organic carbon) high density polypropylene test tubes in three replicates. In addition to the water sampling, the following instruments were used directly in the field: Hanna Instrument pen (HI 98129; for water temperature, pH and electric conductivity), Hanna Checker®HC Handheld Colorimeter (for alkalinity), and a Hach 2100Q Portable Turbidimeter (for turbidity).

**Table S1.** Water sampling protocol for the Nautanen field campaign 2017.

| Water analysis     | Filtering                                                                     | Preservation in the field              | Until laboratory | Analysis instrument                                                          |
|--------------------|-------------------------------------------------------------------------------|----------------------------------------|------------------|------------------------------------------------------------------------------|
| Metals and cations | <u>Dissolved phase:</u><br>Filtropur S 0.22 µm syringe filters                | Acidified* with HNO <sub>3</sub> (69%) | Cool and dark    | ICP-OES** and CETAC Ultrasonic Nebulizer***                                  |
|                    | <u>Total phase:</u><br>no filtering                                           | Acidified* with HNO <sub>3</sub> (69%) | Cool and dark    | ICP-OES** and CETAC Ultrasonic Nebulizer ***                                 |
| Organic carbon     | <u>Dissolved organic carbon (DOC):</u><br>Filtropur S 0.22 µm syringe filters | Acidified* with HNO <sub>3</sub> (69%) | Cool and dark    | Shimadzu TOC-V CPH<br>Instrumental accuracy: ±0.2 mg C l <sup>-1</sup>       |
|                    | <u>Total organic carbon (TOC):</u><br>no filtering                            | Acidified* with HNO <sub>3</sub> (69%) | Cool and dark    | Shimadzu TOC-V CPH.<br>Instrumental accuracy: ±0.2 mg C l <sup>-1</sup>      |
| Anions             | <u>Total phase:</u><br>no filtering                                           | -                                      | Cool and dark    | Thermo Scientific™ Dionex™<br>Ion chromatography. Instrumental accuracy: 10% |

\* Corresponding to 1% of the sample volume.

\*\* Inductive coupled plasma optical emission spectrometry. Instrumental accuracy: 10% (±5%).

\*\*\* For trace element concentrations.

All the water samples collected in the field 2017 were analyzed at Stockholm University, Sweden. Specifically, the metals and cations were analyzed at the Department of Geological Sciences, and the organic carbon and anions were analyzed at the Department of Environmental Science and Analytical Chemistry. Analysis of metal and cation concentrations was tested for about 50 different elements at the laboratory. From the analysis results, the following selection processes included removing elements if they:

- (1.) had more than 85% of its values below the instrumental detection limit, or

- (2.) had a difference larger than 10% between the calculated mean values (i) and (ii), obtained by assuming that (i) all values below the detection limit were equal to zero, and (ii) all values below the detection limit were equal to the detection limit, or
- (3.) had an average triplicate coefficient of variation (CV) of more than 0.15 [34].

This resulted in 37 remaining elements: Al, Ba, Be, Ca, Cd, Ce, Cl, Co, Cu, F, Fe, K, La, Li, Mg, Mn, Mo, Na, Ni, P, S, Si, Sr, Ti, V, Y, Yb as well as SO<sub>4</sub> and DOC. From this list, the 11 elements; Al, Ba, Cd, Co, Cu, Fe, Mn, Mo, Ni, DOC and SO<sub>4</sub>, were chosen for more detailed analysis due to their common association with mining activities and related geochemical processes [32]. An exception to the above selection process was Zn, that had all its values above the detection limit but the triplicate CV was 0.20 (compared to the threshold of 0.15). The higher CV came mostly from triplicates of samples with lower Zn concentrations (<10 µg/L) while the majority of the samples had their triplicate CV below 0.15. Since a high content of Zn in tailings could increase formation of acid mine drainage [33] we included Zn to the list of elements for further analysis. As, Pb and Cr had all values close to or below the detection limit and were not included in further analysis. The difference between dissolved and total concentrations, as well as the difference between samples collected in May and August, were analyzed through paired (dependent) t-test in R.

The historical field data were reported to have been analyzed with inductive coupled plasma mass spectrometry (ICP-MS), or sector field mass spectrometry (-SFMS) or atomic emission spectroscopy (-AES) at SWEDAC accredited laboratories SGAB (Svensk Grundämnesanalys AB) and ALS Scandinavia between 1993 and 2014. Most of the sampling locations of these previous campaigns were similar to our sampling locations in 2017, however they used other reference streams and some additional downstream locations below our most downstream location (D2 at 4 km downstream of the main mining zone).

### S3. Water balance calculations:

The water balance calculations were based on temperature and precipitation data from CRU (described in S1). The monthly temperature data was further averaged into an average temperature for each year ( $T$ ), and the monthly precipitation data was summed to an annual total precipitation ( $P$ ). Thus, for each year, the water balance was calculated through:

$$P = ET_a + R + \Delta S \quad (S1)$$

where  $ET_a$  is annual actual evapotranspiration,  $R$  is annual runoff and  $\Delta S$  is the change in storage. If assuming  $\Delta S$  is zero over a hydrological year, then solving for  $R$  reduced the equation to:

$$R = P - ET_a \quad (S2)$$

Actual evapotranspiration,  $ET_a$ , was calculated through the equation by Turc [36]:

$$ET_a = \frac{P}{\sqrt{0.9 + \frac{P^2}{ET_p^2}}} \quad (S3)$$

where the potential evapotranspiration,  $ET_p$ , was derived by Langbein [37] as:

$$ET_p = 325 + 21T + 0.9T^2 \quad (S4)$$

The discharge at the D2 location,  $Q_{D2}$ , was calculated by:

$$Q_{D2} = R * A \quad (S5)$$

where  $A$  is the catchment area (6.6 km<sup>2</sup>) at the D2 location 4 km downstream of the main mining zone. Finally, the discharges were averaged over the considered time period (e.g. the 25-year period of 1993 to 2017, or the 110-year period of 1908-2017) to yield an average discharge ( $\bar{Q}_{L,D2}$  and  $\bar{Q}_{100,D2}$ , respectively).

**Table S2.** Results in base chemistry of surface water samples from the 2017 measurement campaign at Nautanen. Coordinates are in WGS 1984.

| Sampling zone                                                       | Sampling point description                                | N-coordinate                                     | E-coordinate | Month    | Q (l s <sup>-1</sup> ) | pH (-) | Temp. (°C) | EC (µS cm <sup>-1</sup> ) | Alkalinity (ppm CaCO <sub>3</sub> ) | Turbidity (NTU) |      |
|---------------------------------------------------------------------|-----------------------------------------------------------|--------------------------------------------------|--------------|----------|------------------------|--------|------------|---------------------------|-------------------------------------|-----------------|------|
| Local background                                                    | Upstream                                                  | Upstream headwater lake                          | 67.20631     | 20.86605 | Aug                    | 5.18   | 3.78       | 13                        | 1                                   | 3               | 0.63 |
|                                                                     |                                                           |                                                  |              |          | Aug                    | 16.8   | 5.9        | 6.1                       | 8                                   | 11              | 0.95 |
|                                                                     | Ref. River                                                | Nietsajoki stream, before junction with Imetjoki | 67.17471     | 20.94924 | May                    | 1180   | 6.91       | 2.92                      | 5                                   | 6               | -    |
|                                                                     |                                                           |                                                  |              |          | Aug                    | 1100   | 6.78       | 9.42                      | 11                                  | 5               | 1.06 |
| Mining zone                                                         | Northern Lake outlet                                      | 67.19771                                         | 20.87255     | May      | 8.5                    | 6.02   | 2.21       | 7                         | 11                                  | -               |      |
|                                                                     |                                                           |                                                  |              | Aug      | 4.97                   | 6.1    | 13.5       | 21                        | 14                                  | 0.7             |      |
|                                                                     | Imetjärvi Lake inlet                                      | 67.19686                                         | 20.87686     | May      | 15.4                   | 6.46   | 3.11       | 5                         | 8                                   | -               |      |
|                                                                     |                                                           |                                                  |              | Aug      | 21.6                   | 6.12   | 10.5       | 11                        | 12                                  | 0.61            |      |
|                                                                     | Inside Maria mine                                         | 67.19313                                         | 20.87471     | Aug      | -                      | 6.32   | 2.52       | 21                        | 13                                  | 1.76            |      |
|                                                                     | Maria Lake outlet                                         | 67.19465                                         | 20.87921     | May      | -                      | 5.7    | 6.89       | 7                         | 10                                  | -               |      |
|                                                                     |                                                           |                                                  |              | Aug      | -                      | 5.65   | 13.9       | 11                        | 4                                   | 1.32            |      |
|                                                                     | Small stream at industrial area, upper part               | 67.19508                                         | 20.88327     | May      | -                      | 3.26   | 6.77       | 594                       | 0                                   | -               |      |
|                                                                     |                                                           |                                                  |              | Aug      | -                      | 4.79   | 11.3       | 132                       | 8                                   | 63.7            |      |
|                                                                     | Smaller stream at industrial area, lower part             | 67.19455                                         | 20.88484     | May      | 2.85                   | 6.23   | 4.68       | 181                       | 9                                   | -               |      |
|                                                                     |                                                           |                                                  |              | Aug      | 17.9                   | 6.11   | 11.5       | 171                       | 12                                  | 1.29            |      |
|                                                                     | Imetjärvi Lake outlet                                     | 67.19550                                         | 20.87952     | May      | 48.6                   | 6.05   | 2.12       | 8                         | 14                                  | -               |      |
|                                                                     |                                                           |                                                  |              | Aug      | 24.2                   | 5.85   | 13.5       | 11                        | 11                                  | 1.01            |      |
|                                                                     | Max mine outflow                                          | 67.18951                                         | 20.88706     | Aug      | -                      | 6.82   | 3.5        | 60                        | 23                                  | 0.84            |      |
|                                                                     | Downstream 1                                              | Directly below industrial area                   | 67.19420     | 20.88862 | May                    | 110    | 7.1        | 2.13                      | 8                                   | 12              | -    |
|                                                                     |                                                           |                                                  |              |          | Aug                    | 55.6   | 6.84       | 11.3                      | 19                                  | 7               | 0.89 |
| Further below industrial area, after wetland                        |                                                           | 67.19415                                         | 20.88998     | Aug      | -                      | 6.72   | 11.4       | 17                        | 10                                  | 0.9             |      |
| Small brook in the forest draining the area 250m below Fredrik mine | 67.19120                                                  | 20.88791                                         | May          | -        | 6.54                   | 1.16   | 29         | 17                        | -                                   |                 |      |
| Downstream 2                                                        | Downstream Imetjoki before junction with Nietsajoki River | 67.17489                                         | 20.94776     | May      | 82                     | 6.81   | 3.88       | 13                        | 4                                   | -               |      |
|                                                                     |                                                           |                                                  |              | Aug      | 158                    | 6.98   | 9.81       | 17                        | 15                                  | 0.91            |      |

**Table S3.** Results of total element concentrations in surface water samples from the 2017 measurement campaign at Nautanen. All concentrations are in µg/L and are the triplicate median. Numbers in red had values below detection limit and was therefore replaced by the detection limit value (see text S2).

| Sampling zone    | Sampling point description                    | Month                                            | Cu     | Zn     | Co     | Cd      | Ni     | Mo     | Ba     | Mn      | Al     | Fe     | DOC   | SO <sub>4</sub> |      |
|------------------|-----------------------------------------------|--------------------------------------------------|--------|--------|--------|---------|--------|--------|--------|---------|--------|--------|-------|-----------------|------|
|                  | Detection limit value:                        |                                                  | 0.0278 | 0.0604 | 0.032  | 0.00904 | 0.07   | 0.0137 | 0.0174 | 0.00485 | 0.0294 | 0.0324 | 200   | 200             |      |
|                  | % below detection limit:                      |                                                  | 0      | 0      | 14     | 1       | 56     | 4      | 0      | 0       | 0      | 0      | 0     | 4               |      |
| Local background | Upstream                                      | Upstream headwater lake                          | Aug    | 0.953  | 4.14   | 0.1     | 0.0135 | 0.07   | 0.0137 | 4.5     | 7.69   | 104    | 187   | 11600           | 200  |
|                  |                                               | Upstream the Dagny mine                          | Aug    | 9.17   | 3.28   | 0.032   | 0.0145 | 0.07   | 0.325  | 3.47    | 1.23   | 31.1   | 14.2  | 2540            | 1290 |
|                  | Ref. River                                    | Nietsajoki stream, before junction with Imetjoki | May    | 0.574  | 1.36   | 0.032   | 0.0192 | 0.07   | 0.154  | 5.81    | 12     | 31.2   | 556   | 5400            | 909  |
|                  |                                               |                                                  | Aug    | 0.603  | 2.42   | 0.032   | 0.0217 | 0.07   | 0.214  | 7.56    | 18     | 34     | 451   | 7400            | 945  |
|                  | Lina River, close to Koskullskulle village    | May                                              | 0.755  | 1.38   | 0.0545 | 0.0254  | 0.07   | 0.251  | 6.08   | 9.11    | 45.2   | 609    | 6460  | 5890            |      |
| Aug              |                                               | 1.83                                             | 2.29   | 0.224  | 0.0181 | 0.0982  | 0.784  | 8.08   | 11.4   | 45.4    | 363    | 6820   | 11600 |                 |      |
| Mining zone      | Northern Lake outlet                          | May                                              | 53.6   | 5.31   | 0.678  | 0.0124  | 0.07   | 0.517  | 8.54   | 15.8    | 79.2   | 155    | 4480  | 3180            |      |
|                  |                                               | Aug                                              | 28.3   | 3.98   | 0.122  | 0.0131  | 0.07   | 1.17   | 10     | 5.57    | 38.6   | 97     | 4800  | 5350            |      |
|                  | Imetjärvi Lake inlet                          | May                                              | 11.4   | 2.92   | 0.235  | 0.0177  | 0.07   | 0.331  | 6.11   | 26.8    | 56.8   | 274    | 5330  | 1420            |      |
|                  |                                               | Aug                                              | 13.2   | 3.73   | 0.325  | 0.0288  | 0.07   | 0.422  | 7.9    | 25.4    | 82.5   | 462    | 8960  | 1170            |      |
|                  | Inside Maria mine                             | Aug                                              | 344    | 16.6   | 2.73   | 0.0255  | 0.57   | 0.508  | 24     | 34.3    | 110    | 157    | 3160  | 7620            |      |
|                  | Maria Lake outlet                             | May                                              | 245    | 9.88   | 1.98   | 0.0338  | 0.198  | 0.132  | 22.3   | 41.5    | 175    | 458    | 6800  | 3110            |      |
|                  |                                               | Aug                                              | 269    | 11.6   | 2.33   | 0.031   | 0.248  | 0.285  | 23.4   | 48.3    | 157    | 457    | 8350  | 5130            |      |
|                  | Small stream at industrial area, upper part   | May                                              | 5060   | 4380   | 40.6   | 14.8    | 0.07   | 0.526  | 38.7   | 707     | 3910   | 15800  | 1540  | 153000          |      |
|                  |                                               | Aug                                              | 1250   | 843    | 7.03   | 2.8     | 1.81   | 0.807  | 25.5   | 248     | 848    | 1120   | 2050  | 56100           |      |
|                  | Smaller stream at industrial area, lower part | May                                              | 2920   | 776    | 12     | 2.69    | 5.57   | 0.76   | 36.8   | 389     | 274    | 26.8   | 1310  | 65800           |      |
|                  |                                               | Aug                                              | 2530   | 721    | 7.9    | 2.65    | 4.58   | 0.823  | 29.9   | 295     | 248    | 30.3   | 1810  | 72900           |      |
|                  | Imetjärvi Lake outlet                         | May                                              | 66     | 4.93   | 0.682  | 0.0262  | 0.07   | 0.318  | 11.5   | 48      | 80.1   | 308    | 5490  | 1890            |      |
| Aug              |                                               | 57.9                                             | 6.19   | 0.267  | 0.0203 | 0.07    | 0.499  | 9.74   | 31.8   | 60.4    | 248    | 6050   | 2180  |                 |      |
| Max mine outflow | Aug                                           | 582                                              | 20     | 5.31   | 0.0425 | 0.806   | 3.08   | 11.2   | 41.6   | 34.4    | 27     | 2000   | 12900 |                 |      |

|              |                                                                     |     |      |      |       |         |        |       |      |       |      |      |      |      |
|--------------|---------------------------------------------------------------------|-----|------|------|-------|---------|--------|-------|------|-------|------|------|------|------|
| Downstream 1 | Directly below industrial area                                      | May | 90.7 | 22   | 0.525 | 0.0828  | 0.07   | 0.366 | 9.4  | 38.9  | 64   | 340  | 5200 | 3070 |
|              |                                                                     | Aug | 148  | 46.1 | 0.428 | 0.163   | 0.228  | 0.453 | 11.7 | 28.6  | 61.6 | 309  | 6730 | 5400 |
|              | Further below industrial area, after wetland                        | Aug | 138  | 44.1 | 0.47  | 0.155   | 0.182  | 0.474 | 11.2 | 36.2  | 61.5 | 358  | 6600 | 4930 |
|              | Small brook in the forest draining the area 250m below Fredrik mine | May | 19.9 | 3.53 | 0.032 | 0.00922 | 0.0791 | 0.875 | 8.65 | 0.386 | 60.2 | 24.8 | 5270 | 7620 |
| Downstream 2 | Downstream Imetjoki before junction with Nietsajoki River           | May | 39.6 | 9.47 | 0.141 | 0.0416  | 0.07   | 0.245 | 10.6 | 42.7  | 42.4 | 495  | 5300 | 1860 |
|              |                                                                     | Aug | 37.2 | 11.3 | 0.105 | 0.0403  | 0.07   | 0.334 | 12.7 | 47.8  | 35.3 | 382  | 6560 | 1610 |

**Table S4.** Synthesis of historical field measurement campaigns at Nautanen.

| Year | Source              | Total Cu concentration (µg/L) | Original sampling ID | Sampling zone    | Description                                     |
|------|---------------------|-------------------------------|----------------------|------------------|-------------------------------------------------|
| 1993 | Larborn, 1993 [19]  | 230                           | -                    | Main mining      | Stream at the industrial area                   |
|      |                     | 240                           | -                    | Main mining      | Stream at the industrial area                   |
|      |                     | 4.6                           | -                    | Far downstream*  | Downstream of the Imetjoki-Nietsajoki junction  |
| 1994 | Eriksson, 1994 [31] | 0.79                          | Ref 2                | Local background | Up on the hill next to Dagny mine               |
|      |                     | 3.2                           | Ref 3                | Local background | In the forest NE of main mining zone            |
|      |                     | 190                           | Naut 1               | Downstream 1     | Downstream industrial area, below wetland       |
|      |                     | 51                            | Naut 4               | Downstream 2     | Downstream Imetjoki, before Nietsajoki junction |
|      |                     | 7.9                           | Naut 5               | Far downstream*  | Downstream of the Imetjoki-Nietsajoki junction  |
| 2001 | Bergman 2002 [18]   | 1.7                           | Naut bäcken          | Local background | Nautanen stream (south of the Nautanen hill)    |
|      |                     | <1                            | Nietsajoki           | Local background | Nietsajoki stream                               |
|      |                     | 19                            | Dagny 5              | Main mining      | Stream from Dagny mining site                   |
|      |                     | 11                            | Mellansjö 3          | Main mining      | Stream to Imetjärvi                             |
|      |                     | 660                           | 16                   | Main mining      | Surface water, Maria mine                       |
|      |                     | 860                           | -                    | Main mining      | Stream between Maria Lake and Imetjärvi         |
|      |                     | 860                           | 8                    | Main mining      | Stream between Maria Lake and Imetjärvi         |
|      |                     | 58                            | 5                    | Main mining      | Stream from Imetjärvi                           |

|           |                                 |           |        |                  |                                                                                   |
|-----------|---------------------------------|-----------|--------|------------------|-----------------------------------------------------------------------------------|
|           |                                 | 58        | 4      | Main mining      | Small stream towards industrial area                                              |
|           |                                 | 103       | 4      | Main mining      | Small stream towards industrial area                                              |
|           |                                 | 260       | 4      | Main mining      | Imetjoki, upper part of industrial area                                           |
|           |                                 | 440       | 3      | Main mining      | Stream through industrial area                                                    |
|           |                                 | 120       | 3      | Main mining      | Imetjoki after junction at industrial area                                        |
|           |                                 | 79        | 3      | Main mining      | Stream through industrial area after junction                                     |
|           |                                 | 704       | 9      | Main mining      | Surface water Max mine                                                            |
|           |                                 | 120       | -      | Downstream 1     | Downstream industrial area                                                        |
|           |                                 | 35        | -      | Downstream 2     | Downstream Imetjoki, before Nietsajoki junction                                   |
| 2005-2009 | Jonasson and Grahn 2015<br>[23] | 27-81     | 7 OF   | Main mining      | At Dagny mine                                                                     |
|           |                                 | 16-30     | 6 OF   | Main mining      | Into Imetjärvi                                                                    |
|           |                                 | 1010-1700 | 5 OF   | Main mining      | Maria mine                                                                        |
|           |                                 | 380-760   | 4 OF   | Main mining      | Stream between Maria Lake and Imetjärvi                                           |
|           |                                 | 57-91     | 8 OF   | Main mining      | Outflow Imetjärvi                                                                 |
|           |                                 | 43-97     | 2 OF   | Main mining      | Upper industrial area                                                             |
|           |                                 | 590-1060  | 1 OF   | Main mining      | Max mine                                                                          |
|           |                                 | 107-170   | 3 OF   | Downstream 1     | Downstream industrial area                                                        |
| 2014      | Jonasson and Grahn 2015<br>[23] | 0.16-2.4  | C16 OF | Local background | Nietsajoki stream, further upstream of junction with Imetjoki                     |
|           |                                 | 5.8-8.6   | A11 OF | Main mining      | Outflow from Northern Lake                                                        |
|           |                                 | 9.2-18    | 7 OF   | Main mining      | At Dagny mine                                                                     |
|           |                                 | 7.0-12    | 6 OF   | Main mining      | Into Imetjärvi                                                                    |
|           |                                 | 330       | 5 OF   | Main mining      | Maria mine                                                                        |
|           |                                 | 330-340   | 4 OF   | Main mining      | Stream between Maria Lake and Imetjärvi                                           |
|           |                                 | 68-86     | 8 OF   | Main mining      | Outflow Imetjärvi                                                                 |
|           |                                 | 28-50     | 2 OF   | Main mining      | Upper industrial area                                                             |
|           |                                 | 780       | 1 OF   | Main mining      | Max mine                                                                          |
|           |                                 | 120-160   | 3 OF   | Downstream 1     | Downstream industrial area                                                        |
|           |                                 | 120-140   | 9 OF   | Downstream 1     | Downstream industrial area                                                        |
|           |                                 | 120-130   | B12 OF | Downstream 1     | Downstream industrial area, about 670m downstream Imetjärvi at the second wetland |
|           |                                 | 3.9-6.6   | D OF   | Far downstream*  | Downstream, 7 km below main mining zone                                           |

\* Further downstream than our sampling zone D2.
